# Supplementary material for: Organ Involvement in COVID-19: A Molecular Investigation of Autopsied Patients
Source: MDPI journal article supplement (doi:10.3390/microorganisms10071333), 2022-07-01
Supplement: s1 [file s1]

**Supplementary Table S1. The Clinical Details of 21 cases along the the molecular diagnosis (qRT-PCR) results for all the 246 organs sincluded in the study.**

| S. No | Lab-ID | Date       | Name    | Age | Gender | Hospitaliz<br>ation<br>Days | ARDS* | Unique<br>Organ<br>ID | Organ/Body Fluids | Gene of Interest      |                 | Qualititati<br>ve<br>Inference |
|-------|--------|------------|---------|-----|--------|-----------------------------|-------|-----------------------|-------------------|-----------------------|-----------------|--------------------------------|
|       |        |            |         |     |        |                             |       |                       |                   | ORF<br>(Confirmatory) | RNP<br>(For QC) |                                |
| 1     |        | 16.08.2020 | CASE-01 | 58  | M      | 16                          | 2     | D-41                  | Kidney            | 28.08                 | 17.59           | Positive                       |
| 2     |        |            |         |     |        |                             |       | D-42                  | Liver             | 28.56                 | 17.22           | Positive                       |
| 3     |        |            |         |     |        |                             |       | D-43                  | Brain             | 31.96                 | 18.06           | Positive                       |
| 4     |        |            |         |     |        |                             |       | D-44                  | Trachea           | 31.32                 | 18.13           | Positive                       |
| 5     |        |            |         |     |        |                             |       | D-45                  | Lung              | 28.20                 | 15.87           | Positive                       |
| 6     |        |            |         |     |        |                             |       | D-46                  | Nasopharynx       | 26.55                 | 23.10           | Positive                       |
| 7     |        | 26.08.2020 | CASE-02 | 67  | M      | 6                           | 2     | B-14                  | Kidney            | NA                    | 38.10           | Negative                       |
| 8     |        |            |         |     |        |                             |       | B-15                  | Kidney            | 35.15                 | 7.34            | Positive                       |
| 9     |        |            |         |     |        |                             |       | B-16                  | Brain             | NA                    | 12.60           | Negative                       |
| 10    |        |            |         |     |        |                             |       | B-18                  | Liver             | 25.59                 | 16.80           | Positive                       |
| 11    |        |            |         |     |        |                             |       | B-19                  | Liver             | 37.70                 | 16.72           | Positive                       |
| 12    |        |            |         |     |        |                             |       | B-20                  | Trachea           | 33.28                 | 21.36           | Positive                       |
| 13    |        |            |         |     |        |                             |       | B-21                  | Lung              | 22.34                 | 13.77           | Positive                       |
| 14    |        |            |         |     |        |                             |       | B-22                  | Lung              | 28.92                 | 19.85           | Positive                       |
| 15    |        |            |         |     |        |                             |       | B-23                  | Lung              | 29.45                 | 17.84           | Positive                       |
| 16    |        |            |         |     |        |                             |       | B-24                  | Lung              | 34.60                 | 29.13           | Positive                       |
| 17    |        |            |         |     |        |                             |       | B-25                  | Nasopharynx       | 26.01                 | 18.58           | Positive                       |
| 18    |        | 26.08.2020 | CASE-03 | 25  | M      | 14                          | 3     | A-2                   | Kidney            | 29.30                 | 20.74           | Positive                       |
| 19    |        |            |         |     |        |                             |       | A-3                   | Brain             | NA                    | 15.88           | Negative                       |
| 20    |        |            |         |     |        |                             |       | A-4                   | Brain             | NA                    | 11.90           | Negative                       |
| 21    |        |            |         |     |        |                             |       | A-6                   | Liver             | NA                    | 18.63           | Negative                       |
| 22    |        |            |         |     |        |                             |       | A-7                   | Lung              | 20.62                 | 13.73           | Positive                       |
| 23    |        |            |         |     |        |                             |       | A-8                   | Lung              | 21.58                 | 14.04           | Positive                       |
| 24    |        |            |         |     |        |                             |       | A-9                   | Lung              | 29.38                 | 21.28           | Positive                       |
| 25    |        |            |         |     |        |                             |       | A-10                  | Trachea           | 28.99                 | 16.29           | Positive                       |
| 26    |        |            |         |     |        |                             |       | A-11                  | Nasopharynx       | 27.24                 | 19.11           | Positive                       |
| 27    |        |            |         |     |        |                             |       | A-12                  | Peritoneal Fluid  | 32.24                 | 12.68           | Positive                       |
| 28    |        |            |         |     |        |                             |       | A-13                  | Peritoneal Fluid  | 30.74                 | 19.03           | Positive                       |
| 29    |        | 28.08.2020 | CASE-04 | 30  | M      | 2                           | 3     | C-26                  | Brain             | 33.01                 | 25.84           | Positive                       |
| 30    |        |            |         |     |        |                             |       | C-27                  | Brain             | 22.92                 | 15.06           | Positive                       |
| 31    |        |            |         |     |        |                             |       | C-28                  | Liver             | 14.65                 | 16.10           | Positive                       |

| S. No | Lab-ID | Date       | Name    | Age | Gender | Hospitaliz<br>ation<br>Days | ARDS* | Unique<br>Organ<br>ID | Organ/Body Fluids | Gene of Interest      |                 | Qualititati<br>ve<br>Inference |
|-------|--------|------------|---------|-----|--------|-----------------------------|-------|-----------------------|-------------------|-----------------------|-----------------|--------------------------------|
|       |        |            |         |     |        |                             |       |                       |                   | ORF<br>(Confirmatory) | RNP<br>(For QC) |                                |
| 32    |        |            |         |     |        |                             |       | C-29                  | Liver             | 24.30                 | 26.33           | Positive                       |
| 33    |        |            |         |     |        |                             |       | C-30                  | Spleen            | 19.76                 | 17.10           | Positive                       |
| 34    |        |            |         |     |        |                             |       | C-31                  | Lung              | 19.74                 | 27.00           | Positive                       |
| 35    |        |            |         |     |        |                             |       | C-32                  | Lung              | 20.48                 | 27.83           | Positive                       |
| 36    |        |            |         |     |        |                             |       | C-33                  | Kidney            | 14.56                 | 10.73           | Positive                       |
| 37    |        |            |         |     |        |                             |       | C-34                  | Kidney            | 26.39                 | 27.28           | Positive                       |
| 38    |        |            |         |     |        |                             |       | C-35                  | Lung              | 23.15                 | 8.80            | Positive                       |
| 39    |        |            |         |     |        |                             |       | C-36                  | Nasopharynx       | 20.84                 | 18.52           | Positive                       |
| 40    |        |            |         |     |        |                             |       | C-37                  | Trachea           | 14.25                 | 17.36           | Positive                       |
| 41    |        |            |         |     |        |                             |       | C-38                  | Pleural Fluid     | 25.35                 | 18.88           | Positive                       |
| 42    |        |            |         |     |        |                             |       | C-39                  | Peritoneal Fluid  | 28.40                 | 18.76           | Positive                       |
| 43    |        | 01.09.2020 | CASE-05 | 60  | M      | 39                          | 3     | G-54                  | Peritoneal Fluid  | 29.99                 | 20.39           | Positive                       |
| 44    |        |            |         |     |        |                             |       | O-63                  | Liver             | NA                    | 24.45           | Negative                       |
| 45    |        |            |         |     |        |                             |       | O-64                  | Lung              | 25.02                 | 11.87           | Positive                       |
| 46    |        |            |         |     |        |                             |       | O-65                  | Nasopharynx       | 36.93                 | 21.88           | Positive                       |
| 47    |        |            |         |     |        |                             |       | O-66                  | Lung              | NA                    | 24.19           | Negative                       |
| 48    |        |            |         |     |        |                             |       | O-67                  | Liver             | NA                    | 25.07           | Negative                       |
| 49    |        |            |         |     |        |                             |       | O-68                  | Lung              | 36.18                 | 24.26           | Positive                       |
| 50    |        |            |         |     |        |                             |       | O-69                  | Trachea           | NA                    | 28.53           | Negative                       |
| 51    |        |            |         |     |        |                             |       | O-71                  | Brain             | 28.50                 | 17.67           | Positive                       |
| 52    |        |            |         |     |        |                             |       | O-72                  | Kidney            | NA                    | 15.08           | Negative                       |
| 53    |        |            |         |     |        |                             |       | O-73                  | Kidney            | NA                    | 25.53           | Negative                       |
| 54    |        | 02.09.2020 | CASE-06 | 30  | M      | 4                           | 2     | K-59                  | Peritoneal Fluid  | 30.95                 | 21.36           | Positive                       |
| 55    |        |            |         |     |        |                             |       | Y-186                 | Lung              | 19.96                 | 22.20           | Positive                       |
| 56    |        |            |         |     |        |                             |       | Y-187                 | Brain             | NA                    | 22.16           | Negative                       |
| 57    |        |            |         |     |        |                             |       | Y-188                 | Liver             | 30.13                 | 25.87           | Positive                       |
| 58    |        |            |         |     |        |                             |       | Y-189                 | Lung              | 23.02                 | 18.25           | Positive                       |
| 59    |        |            |         |     |        |                             |       | Y-190                 | Brain             | 37.96                 | 26.41           | Positive                       |
| 60    |        |            |         |     |        |                             |       | Y-191                 | Lung              | 23.56                 | 23.81           | Positive                       |
| 61    |        |            |         |     |        |                             |       | Y-192                 | Nasopharynx       | 19.19                 | 22.79           | Positive                       |
| 62    |        |            |         |     |        |                             |       | Y-193                 | Kidney            | 26.51                 | 24.66           | Positive                       |
| 63    |        |            |         |     |        |                             |       | Y-194                 | Liver             | NA                    | 16.18           | Negative                       |
| 64    |        |            |         |     |        |                             |       | Y-195                 | Trachea           | 21.85                 | 24.45           | Positive                       |

| S. No | Lab-ID | Date       | Name    | Age | Gender | Hospitalization Days | ARDS* | Unique Organ ID | Organ/Body Fluids | Gene of Interest   |              | Qualitative Inference |
|-------|--------|------------|---------|-----|--------|----------------------|-------|-----------------|-------------------|--------------------|--------------|-----------------------|
|       |        |            |         |     |        |                      |       |                 |                   | ORF (Confirmatory) | RNP (For QC) |                       |
| 65    |        |            |         |     |        |                      |       | Y-196           | Kidney            | 16.16              | 18.95        | Positive              |
| 66    |        | 31.09.2020 | CASE-07 | 51  | M      | 3                    | 3     | J-58            | Peritoneal Fluid  | NA                 | 24.09        | Negative              |
| 67    |        |            |         |     |        |                      |       | T-125           | Kidney            | 25.19              | 15.14        | Positive              |
| 68    |        |            |         |     |        |                      |       | T-126           | Liver             | 28.78              | 21.02        | Positive              |
| 69    |        |            |         |     |        |                      |       | T-127           | Brain             | NA                 | 27.16        | Negative              |
| 70    |        |            |         |     |        |                      |       | T-128           | Kidney            | 30.90              | 24.84        | Positive              |
| 71    |        |            |         |     |        |                      |       | T-129           | Lung              | 20.80              | 84.80        | Positive              |
| 72    |        |            |         |     |        |                      |       | T-130           | Lung              | 18.96              | 23.51        | Positive              |
| 73    |        |            |         |     |        |                      |       | T-131           | Lung              | 18.27              | 19.34        | Positive              |
| 74    |        |            |         |     |        |                      |       | T-132           | Brain             | 26.72              | 20.43        | Positive              |
| 75    |        |            |         |     |        |                      |       | T-133           | Nasopharynx       | 27.23              | 25.91        | Positive              |
| 76    |        |            |         |     |        |                      |       | T-134           | Liver             | 31.48              | 24.76        | Positive              |
| 77    |        |            |         |     |        |                      |       | T-135           | Trachea           | 28.43              | 25.55        | Positive              |
| 78    |        | 04.09.2020 | CASE-08 | 75  | M      | 6                    | 2     | b-223           | Lung              | 30.71              | 19.38        | Positive              |
| 79    |        |            |         |     |        |                      |       | b-224           | Trachea           | NA                 | 14.41        | Negative              |
| 80    |        |            |         |     |        |                      |       | b-225           | Lung              | NA                 | 8.20         | Negative              |
| 81    |        |            |         |     |        |                      |       | b-226           | Pericardial Fluid | 35.25              | 22.27        | Positive              |
| 82    |        |            |         |     |        |                      |       | b-227           | Kidney            | NA                 | 20.87        | Negative              |
| 83    |        |            |         |     |        |                      |       | b-229           | Brain             | 32.02              | 9.19         | Positive              |
| 84    |        |            |         |     |        |                      |       | b-230           | Liver             | 27.33              | 18.36        | Positive              |
| 85    |        |            |         |     |        |                      |       | b-231           | Nasopharynx       | 25.73              | 17.33        | Positive              |
| 86    |        |            |         |     |        |                      |       | b-232           | Lung              | NA                 | 23.71        | Negative              |
| 87    |        |            |         |     |        |                      |       | b-233           | Liver             | 31.02              | 22.79        | Positive              |
| 88    |        |            |         |     |        |                      |       | b-234           | Kidney            | 19.56              | 13.64        | Positive              |
| 89    |        | 07.09.2020 | CASE-09 | 64  | M      | 9                    | 2     | Z-198           | Liver             | 36.61              | 20.99        | Positive              |
| 90    |        |            |         |     |        |                      |       | Z-199           | Liver             | NA                 | 33.99        | Negative              |
| 91    |        |            |         |     |        |                      |       | Z-200           | Lung              | 33.86              | 33.96        | Positive              |
| 92    |        |            |         |     |        |                      |       | Z-201           | Nasopharynx       | NA                 | 23.75        | Negative              |
| 93    |        |            |         |     |        |                      |       | Z-202           | Brain             | NA                 | 27.81        | Negative              |
| 94    |        |            |         |     |        |                      |       | Z-203           | Pericardial Fluid | NA                 | 32.26        | Negative              |
| 95    |        |            |         |     |        |                      |       | Z-204           | Lung              | 34.09              | 24.15        | Positive              |
| 96    |        |            |         |     |        |                      |       | Z-206           | Trachea           | NA                 | 24.93        | Negative              |
| 97    |        |            |         |     |        |                      |       | Z-207           | Kidney            | NA                 | 23.76        | Negative              |

| S. No | Lab-ID | Date       | Name    | Age | Gender | Hospitaliz<br>ation<br>Days | ARDS* | Unique<br>Organ<br>ID | Organ/Body Fluids | Gene of Interest      |                 | Qualititati<br>ve<br>Inference |
|-------|--------|------------|---------|-----|--------|-----------------------------|-------|-----------------------|-------------------|-----------------------|-----------------|--------------------------------|
|       |        |            |         |     |        |                             |       |                       |                   | ORF<br>(Confirmatory) | RNP<br>(For QC) |                                |
| 98    |        |            |         |     |        |                             |       | Z-208                 | Lung              | 38.05                 | 22.17           | Positive                       |
| 99    |        | 08.09.2020 | CASE-10 | 71  | M      | 0                           | NA    | U-137                 | Lung              | 10.14                 | 9.48            | Positive                       |
| 100   |        |            |         |     |        |                             |       | U-138                 | Nasopharynx       | 22.93                 | 26.25           | Positive                       |
| 101   |        |            |         |     |        |                             |       | U-139                 | Kidney            | 25.87                 | 20.28           | Positive                       |
| 102   |        |            |         |     |        |                             |       | U-140                 | Pericardial Fluid | 23.60                 | 19.56           | Positive                       |
| 103   |        |            |         |     |        |                             |       | U-141                 | Lung              | 18.04                 | 25.88           | Positive                       |
| 104   |        |            |         |     |        |                             |       | U-142                 | Kidney            | 29.55                 | 26.00           | Positive                       |
| 105   |        |            |         |     |        |                             |       | U-143                 | Liver             | 21.70                 | 20.81           | Positive                       |
| 106   |        |            |         |     |        |                             |       | U-144                 | Brain             | 25.77                 | 21.76           | Positive                       |
| 107   |        |            |         |     |        |                             |       | U-145                 | Liver             | 27.40                 | 25.48           | Positive                       |
| 108   |        |            |         |     |        |                             |       | U-146                 | Trachea           | 20.53                 | 27.69           | Positive                       |
| 109   |        |            |         |     |        |                             |       | U-147                 | Brain             | 36.19                 | 26.59           | Positive                       |
| 110   |        | 09.09.2020 | CASE-11 | 62  | M      | 5                           | 3     | H-55                  | Peritoneal Fluid  | NA                    | 20.79           | Negative                       |
| 111   |        |            |         |     |        |                             |       | P-74                  | Pericardial Fluid | 23.67                 | 22.69           | Positive                       |
| 112   |        |            |         |     |        |                             |       | P-75                  | Kidney            | 36.24                 | 23.39           | Positive                       |
| 113   |        |            |         |     |        |                             |       | P-76                  | Brain             | NA                    | 24.87           | Negative                       |
| 114   |        |            |         |     |        |                             |       | P-77                  | Lung              | 27.65                 | 24.82           | Positive                       |
| 115   |        |            |         |     |        |                             |       | P-78                  | Lung              | 17.95                 | 13.79           | Positive                       |
| 116   |        |            |         |     |        |                             |       | P-79                  | Nasopharynx       | 22.40                 | 22.97           | Positive                       |
| 117   |        |            |         |     |        |                             |       | P-80                  | Kidney            | 22.83                 | 19.44           | Positive                       |
| 118   |        |            |         |     |        |                             |       | P-81                  | Brain             | NA                    | 20.74           | Negative                       |
| 119   |        |            |         |     |        |                             |       | P-82                  | Lung              | 23.18                 | 23.99           | Positive                       |
| 120   |        |            |         |     |        |                             |       | P-83                  | Trachea           | 31.29                 | 22.74           | Positive                       |
| 121   |        |            |         |     |        |                             |       | P-84                  | Liver             | 30.18                 | 17.81           | Positive                       |
| 122   |        |            |         |     |        |                             |       | P-85                  | Liver             | NA                    | 28.16           | Negative                       |
| 123   |        | 16.09.2020 | CASE-12 | 79  | M      | 8                           | 3     | W-160                 | Nasopharynx       | 35.65                 | 23.21           | Positive                       |
| 124   |        |            |         |     |        |                             |       | W-161                 | Brain             | 38.80                 | 26.11           | Positive                       |
| 125   |        |            |         |     |        |                             |       | W-162                 | Kidney            | NA                    | 24.89           | Negative                       |
| 126   |        |            |         |     |        |                             |       | W-163                 | Lung              | 21.37                 | 16.74           | Positive                       |
| 127   |        |            |         |     |        |                             |       | W-164                 | Liver             | 38.77                 | 24.21           | Positive                       |
| 128   |        |            |         |     |        |                             |       | W-165                 | Liver             | 29.12                 | 18.99           | Positive                       |
| 129   |        |            |         |     |        |                             |       | W-166                 | Brain             | NA                    | 17.48           | Negative                       |
| 130   |        |            |         |     |        |                             |       | W-167                 | Pericardial Fluid | 32.83                 | 20.67           | Positive                       |

| S. No | Lab-ID | Date       | Name    | Age | Gender | Hospitalization Days | ARDS* | Unique Organ ID | Organ/Body Fluids | Gene of Interest   |              | Qualitative Inference |
|-------|--------|------------|---------|-----|--------|----------------------|-------|-----------------|-------------------|--------------------|--------------|-----------------------|
|       |        |            |         |     |        |                      |       |                 |                   | ORF (Confirmatory) | RNP (For QC) |                       |
| 131   |        |            |         |     |        |                      |       | W-168           | Lung              | 31.50              | 23.67        | Positive              |
| 132   |        |            |         |     |        |                      |       | W-169           | Trachea           | 34.66              | 23.19        | Positive              |
| 133   |        |            |         |     |        |                      |       | W-170           | Kidney            | 34.71              | 19.52        | Positive              |
| 134   |        |            |         |     |        |                      |       | W-171           | Lung              | 31.70              | 23.37        | Positive              |
| 135   |        | 17.09.2020 | CASE-13 | 45  | F      | 2                    | 3     | X-172           | Uterus            | 30.42              | 15.42        | Positive              |
| 136   |        |            |         |     |        |                      |       | X-173           | Liver             | 33.34              | 24.45        | Positive              |
| 137   |        |            |         |     |        |                      |       | X-174           | Kidney            | 33.11              | 23.42        | Positive              |
| 138   |        |            |         |     |        |                      |       | X-175           | Brain             | NA                 | 24.69        | Negative              |
| 139   |        |            |         |     |        |                      |       | X-176           | Liver             | 34.18              | 23.17        | Positive              |
| 140   |        |            |         |     |        |                      |       | X-177           | Pericardial Fluid | 28.23              | 23.98        | Positive              |
| 141   |        |            |         |     |        |                      |       | X-178           | Kidney            | 30.52              | 18.86        | Positive              |
| 142   |        |            |         |     |        |                      |       | X-179           | Lung              | 26.10              | 21.66        | Positive              |
| 143   |        |            |         |     |        |                      |       | X-180           | Brain             | NA                 | 19.44        | Negative              |
| 144   |        |            |         |     |        |                      |       | X-181           | Lung              | NA                 | 23.69        | Negative              |
| 145   |        |            |         |     |        |                      |       | X-182           | Nasopharynx       | 26.33              | 23.24        | Positive              |
| 146   |        |            |         |     |        |                      |       | X-183           | Trachea           | 29.93              | 21.76        | Positive              |
| 147   |        |            |         |     |        |                      |       | X-184           | Lung              | 25.48              | 20.81        | Positive              |
| 148   |        |            |         |     |        |                      |       | E-48            | Peritoneal Fluid  | 22.34              | 22.45        | Positive              |
| 149   |        |            |         |     |        |                      |       | E-49            | Pericardial Fluid | 30.86              | 18.50        | Positive              |
| 150   |        | 22.09.2020 | CASE-14 | 75  | M      | 8                    | 2     | F-52            | Peritoneal Fluid  | 29.73              | 26.10        | Positive              |
| 151   |        |            |         |     |        |                      |       | V-148           | Trachea           | 36.23              | 24.91        | Positive              |
| 152   |        |            |         |     |        |                      |       | V-150           | Brain             | NA                 | 25.42        | Negative              |
| 153   |        |            |         |     |        |                      |       | V-151           | Liver             | NA                 | 22.44        | Negative              |
| 154   |        |            |         |     |        |                      |       | V-152           | Liver             | 25.68              | 21.48        | Positive              |
| 155   |        |            |         |     |        |                      |       | V-153           | Lung              | 30.39              | 23.84        | Positive              |
| 156   |        |            |         |     |        |                      |       | V-154           | Kidney            | 33.91              | 24.32        | Positive              |
| 157   |        |            |         |     |        |                      |       | V-155           | Nasopharynx       | 33.42              | 24.79        | Positive              |
| 158   |        |            |         |     |        |                      |       | V-156           | Lung              | 33.00              | 23.42        | Positive              |
| 159   |        |            |         |     |        |                      |       | V-157           | Kidney            | 24.81              | 18.83        | Positive              |
| 160   |        |            |         |     |        |                      |       | V-158           | Lung              | NA                 | 17.15        | Negative              |
| 161   |        | 12.09.2020 | CASE-15 | 70  | F      | 10                   | 3     | S-113           | Liver             | NA                 | 24.09        | Negative              |
| 162   |        |            |         |     |        |                      |       | S-114           | Lung              | 29.33              | 23.95        | Positive              |
| 163   |        |            |         |     |        |                      |       | S-115           | Liver             | 30.19              | 18.19        | Positive              |

| S. No | Lab-ID | Date       | Name    | Age | Gender | Hospitalization Days | ARDS* | Unique Organ ID | Organ/Body Fluids | Gene of Interest   |              | Qualitative Inference |
|-------|--------|------------|---------|-----|--------|----------------------|-------|-----------------|-------------------|--------------------|--------------|-----------------------|
|       |        |            |         |     |        |                      |       |                 |                   | ORF (Confirmatory) | RNP (For QC) |                       |
| 164   |        |            |         |     |        |                      |       | S-116           | Kidney            | 26.77              | 17.79        | Positive              |
| 165   |        |            |         |     |        |                      |       | S-117           | Pericardial Fluid | 26.52              | 24.45        | Positive              |
| 166   |        |            |         |     |        |                      |       | S-118           | Lung              | 26.15              | 23.97        | Positive              |
| 167   |        |            |         |     |        |                      |       | S-119           | Kidney            | NA                 | 25.43        | Negative              |
| 168   |        |            |         |     |        |                      |       | S-120           | Brain             | 32.12              | 22.77        | Positive              |
| 169   |        |            |         |     |        |                      |       | S-121           | Brain             | 39.75              | 25.85        | Positive              |
| 170   |        |            |         |     |        |                      |       | S-122           | Nasopharynx       | 25.85              | 24.34        | Positive              |
| 171   |        |            |         |     |        |                      |       | S-123           | Trachea           | 25.76              | 25.94        | Positive              |
| 172   |        |            |         |     |        |                      |       | S-124           | Lung              | 19.60              | 7.92         | Positive              |
| 173   |        | 04.09.2020 | CASE-16 | 84  | M      | 10                   | 2     | c-236           | Trachea           | 19.33              | 20.29        | Positive              |
| 174   |        |            |         |     |        |                      |       | c-237           | Pericardial Fluid | NA                 | 26.16        | Negative              |
| 175   |        |            |         |     |        |                      |       | c-238           | Nasopharynx       | 29.19              | 19.69        | Positive              |
| 176   |        |            |         |     |        |                      |       | c-239           | Liver             | NA                 | 22.20        | Negative              |
| 177   |        |            |         |     |        |                      |       | c-240           | Lung              | 22.65              | 19.58        | Positive              |
| 178   |        |            |         |     |        |                      |       | c-241           | Liver             | 29.02              | 18.66        | Positive              |
| 179   |        |            |         |     |        |                      |       | c-242           | Kidney            | NA                 | 15.19        | Negative              |
| 180   |        |            |         |     |        |                      |       | c-244           | Lung              | 21.27              | 10.12        | Positive              |
| 181   |        |            |         |     |        |                      |       | c-245           | Brain             | NA                 | 20.86        | Negative              |
| 182   |        | 04.09.2020 | CASE-17 | 75  | F      | 9                    | 2     | R-101           | Liver             | NA                 | 25.86        | Negative              |
| 183   |        |            |         |     |        |                      |       | R-102           | Pericardial Fluid | 24.05              | 24.00        | Positive              |
| 184   |        |            |         |     |        |                      |       | R-103           | Brain             | 39.01              | 25.92        | Positive              |
| 185   |        |            |         |     |        |                      |       | R-104           | Lung              | 15.34              | 12.94        | Positive              |
| 186   |        |            |         |     |        |                      |       | R-105           | Kidney            | 31.97              | 24.29        | Positive              |
| 187   |        |            |         |     |        |                      |       | R-106           | Nasopharynx       | 21.84              | 22.62        | Positive              |
| 188   |        |            |         |     |        |                      |       | R-107           | Lung              | 28.14              | 25.12        | Positive              |
| 189   |        |            |         |     |        |                      |       | R-108           | Trachea           | 26.73              | 24.60        | Positive              |
| 190   |        |            |         |     |        |                      |       | R-109           | Brain             | NA                 | 34.50        | Negative              |
| 191   |        |            |         |     |        |                      |       | R-110           | Lung              | 26.41              | 25.27        | Positive              |
| 192   |        |            |         |     |        |                      |       | R-111           | Liver             | 30.10              | 18.55        | Positive              |
| 193   |        |            |         |     |        |                      |       | Rx              | Kidney            | 30.30              | 24.67        | Positive              |
| 194   |        | 30.09.2020 | CASE-18 | 72  | M      | 20                   | 3     | a-209           | Liver             | NA                 | 22.15        | Negative              |
| 195   |        |            |         |     |        |                      |       | a-210           | Lung              | 25.75              | 20.50        | Positive              |
| 196   |        |            |         |     |        |                      |       | a-211           | Brain             | 28.44              | 12.44        | Positive              |

| S. No | Lab-ID | Date       | Name    | Age | Gender | Hospitalization Days | ARDS* | Unique Organ ID | Organ/Body Fluids | Gene of Interest   |              | Qualitative Inference |
|-------|--------|------------|---------|-----|--------|----------------------|-------|-----------------|-------------------|--------------------|--------------|-----------------------|
|       |        |            |         |     |        |                      |       |                 |                   | ORF (Confirmatory) | RNP (For QC) |                       |
| 197   |        |            |         |     |        |                      |       | a-212           | Kidney            | 39.65              | 24.46        | Positive              |
| 198   |        |            |         |     |        |                      |       | a-213           | Brain             | NA                 | 24.97        | Negative              |
| 199   |        |            |         |     |        |                      |       | a-214           | Trachea           | 30.97              | 23.54        | Positive              |
| 200   |        |            |         |     |        |                      |       | a-215           | Lung              | NA                 | 25.75        | Negative              |
| 201   |        |            |         |     |        |                      |       | a-216           | Nasopharynx       | 26.16              | 21.49        | Positive              |
| 202   |        |            |         |     |        |                      |       | a-217           | Lung              | 26.74              | 19.74        | Positive              |
| 203   |        |            |         |     |        |                      |       | a-219           | Liver             | NA                 | 13.09        | Negative              |
| 204   |        |            |         |     |        |                      |       | a-220           | Lung              | 21.99              | 19.46        | Positive              |
| 205   |        |            |         |     |        |                      |       | a-221           | Kidney            | NA                 | 10.88        | Negative              |
| 206   |        |            |         |     |        |                      |       | a-222           | Pleural Fluid     | NA                 | 17.15        | Negative              |
| 207   |        | 02.10.2020 | CASE-19 | 64  | F      | 18                   | 3     | Q-86            | Lung              | 37.99              | 24.90        | Positive              |
| 208   |        |            |         |     |        |                      |       | Q-87            | Kidney            | NA                 | 25.87        | Negative              |
| 209   |        |            |         |     |        |                      |       | Q-88            | Lung              | 36.31              | 23.34        | Positive              |
| 210   |        |            |         |     |        |                      |       | Q-89            | Liver             | 31.35              | 18.44        | Positive              |
| 211   |        |            |         |     |        |                      |       | Q-90            | Lung              | NA                 | 24.34        | Negative              |
| 212   |        |            |         |     |        |                      |       | Q-91            | Lung              | 33.02              | 15.87        | Positive              |
| 213   |        |            |         |     |        |                      |       | Q-92            | Lung              | 26.92              | 15.96        | Positive              |
| 214   |        |            |         |     |        |                      |       | Q-93            | Brain             | 24.10              | 16.52        | Positive              |
| 215   |        |            |         |     |        |                      |       | Q-94            | Trachea           | 36.67              | 23.92        | Positive              |
| 216   |        |            |         |     |        |                      |       | Q-95            | Nasopharynx       | 32.90              | 22.16        | Positive              |
| 217   |        |            |         |     |        |                      |       | Q-96            | Liver             | 38.29              | 23.29        | Positive              |
| 218   |        |            |         |     |        |                      |       | Q-97            | Kidney            | NA                 | 16.45        | Negative              |
| 219   |        |            |         |     |        |                      |       | Q-98            | Brain             | NA                 | 23.96        | Negative              |
| 220   |        |            |         |     |        |                      |       | Q-99            | Pericardial Fluid | NA                 | 28.56        | Negative              |
| 221   |        |            |         |     |        |                      |       | Q-100           | Pleural Fluid     | 33.66              | 22.22        | Positive              |
| 222   |        | 21.10.2020 | CASE-20 | 60  | F      | 3                    | 2     | β-1             | Kidney            | 31.80              | 29.83        | Positive              |
| 223   |        |            |         |     |        |                      |       | β-2             | Nasopharynx       | NA                 | 28.00        | Negative              |
| 224   |        |            |         |     |        |                      |       | β-3             | Lung              | 28.94              | 28.03        | Positive              |
| 225   |        |            |         |     |        |                      |       | β-4             | Lung              | NA                 | 32.71        | Negative              |
| 226   |        |            |         |     |        |                      |       | β-5             | Brain             | 33.04              | 32.04        | Positive              |
| 227   |        |            |         |     |        |                      |       | β-6             | Brain             | NA                 | 27.91        | Negative              |
| 228   |        |            |         |     |        |                      |       | β-7             | Liver             | NA                 | 35.40        | Negative              |
| 229   |        |            |         |     |        |                      |       | β-8             | Liver             | 32.25              | 26.85        | Positive              |

| S. No | Lab-ID | Date       | Name    | Age | Gender | Hospitalization Days | ARDS* | Unique Organ ID | Organ/Body Fluids | Gene of Interest   |              | Qualitative Inference |
|-------|--------|------------|---------|-----|--------|----------------------|-------|-----------------|-------------------|--------------------|--------------|-----------------------|
|       |        |            |         |     |        |                      |       |                 |                   | ORF (Confirmatory) | RNP (For QC) |                       |
| 230   |        |            |         |     |        |                      |       | $\beta$ -9      | Pericardial Fluid | NA                 | 34.04        | Negative              |
| 231   |        |            |         |     |        |                      |       | $\beta$ -10     | Lung              | 28.62              | 25.31        | Positive              |
| 232   |        |            |         |     |        |                      |       | $\beta$ -11     | Trachea           | 28.46              | 26.73        | Positive              |
| 233   |        | 28.10.2020 | CASE-21 | 60  | F      | 4                    | 3     | $\alpha$ -1     | Liver             | 34.33              | 27.24        | Positive              |
| 234   |        |            |         |     |        |                      |       | $\alpha$ -2     | Brain             | NA                 | 27.05        | Negative              |
| 235   |        |            |         |     |        |                      |       | $\alpha$ -3     | Liver             | NA                 | 25.35        | Negative              |
| 236   |        |            |         |     |        |                      |       | $\alpha$ -4     | Trachea           | 32.55              | 26.04        | Positive              |
| 237   |        |            |         |     |        |                      |       | $\alpha$ -5     | Kidney            | NA                 | 27.30        | Negative              |
| 238   |        |            |         |     |        |                      |       | $\alpha$ -6     | Lung              | 28.20              | 26.03        | Positive              |
| 239   |        |            |         |     |        |                      |       | $\alpha$ -7     | Lung              | 27.73              | 27.42        | Positive              |
| 240   |        |            |         |     |        |                      |       | $\alpha$ -8     | Brain             | 32.40              | 27.03        | Positive              |
| 241   |        |            |         |     |        |                      |       | $\alpha$ -9     | Nasopharynx       | 31.18              | 25.82        | Positive              |
| 242   |        |            |         |     |        |                      |       | $\alpha$ -10    | Pericardial Fluid | 32.81              | 35.53        | Positive              |
| 243   |        |            |         |     |        |                      |       | $\alpha$ -11    | Lung              | 34.80              | 24.82        | Positive              |
| 244   |        |            |         |     |        |                      |       | $\alpha$ -12    | Kidney            | 29.47              | 26.46        | Positive              |
| 245   |        |            |         |     |        |                      |       | $\gamma$ -2     | Kidney            | 33.92              | 26.45        | Positive              |
| 246   |        |            |         |     |        |                      |       | $\gamma$ -4     | Brain             | NA                 | 37.54        | Negative              |

\*ARDS Categorization of the cases was done at the time of admission to the hospital, Case-10 was declared brought dead, therefore not categorized.

ARDS- Acute Respiratory Distress Syndrome



## Supplementary File S1. COVID Autopsy Microbiological study.

```
---  
title: "COVID Autopsy Microbiological study"  
output:  
  word_document: default  
  pdf_document: default  
---
```

```
``{r setup, include=FALSE}
```

```
knitr::opts_chunk$set(eval = FALSE)
```

```
library(dplyr)  
library(ggplot2)  
library(readxl)  
library(gtsummary)  
library(jpeg)  
library(png)  
library(knitr)  
library(ggpubr)  
library(rstatix)  
library(dplyr)  
library(ggplot2)
```

```

library(readxl)
library(gtsummary)
library(jpeg)
library(png)
library(knitr)
library(ggpubr)
library(rstatix)

df1 <- read_excel("~/Desktop/Autopsy.xlsx")
df1<-df1[complete.cases(df1),]
```

## data cleaning and changing the variable


``{r mplt}
summary(df1)

x<-c("uid","organ_id" , "result")
df1[,x]<-lapply(df1[,x],factor)
str(df1)

df1%>% select(uid,Organ,result )%>%group_by(uid,result)%>%tbl_summary(by=result,percent = "row")

df1%>%filter(result=="Positive")%>%

  select(Organ,result,RNP_value )%>%

  group_by(Organ)%>%

```

```

dplyr::summarize(Count=n(),mean_ct = mean(RNP_value, na.rm = TRUE),std_ct=sd(RNP_v
alue, na.rm = TRUE),median_ct=median(RNP_value, na.rm = TRUE),iqr_ct=IQR(RNP_value,
na.rm = TRUE))

##create a percent site coloumn

df1 %>% select(1,3,4,5) ->df2

df2 %>%

  group_by( uid ) %>%

  summarise(Count=n(), Percent_site = length( result[ which( result == "Positive") ] )/n())
%>%

  arrange( desc( Percent_site ) )->d

data <- left_join(df1,d, by="uid")

data %>% mutate(Intensity=case_when(Percent_site>0.80~"High_intensity",
                                   Percent_site<0.80 & Percent_site<0.60~ "Intermediated_intensity" ,TRUE~"Low
_intensity" ))->data

data$Intensity<-ordered(data$Intensity, levels = c("Low_intensity","Intermediated_intens
ity","High_intensity"),labels=c("Low_intensity","Intermediated_intensity","High_intensity")
)

...

## PLOT

``{r plot, echo=FALSE,fig.width=12,fig.height=6,dpi = 200,out.width='70%'}

data %>% select(3,4,5,8)->data1

data1 %>% group_by(Organ,result,Intensity) %>% summarise(Count=n())->data2

# Sort by the Organ and result columns

data2 <- data2 %>%

  arrange(Organ,result)

# Get the cumulative sum

```

```

library(ggthemes)

data2<- data2 %>%

  group_by(Organ) %>%

  mutate(label_y = cumsum(Count))

data2%>% ggplot(aes(x =Organ,y=Count ,fill=result))+geom_col(position = "dodge")+facet
_wrap(~Intensity, scales = "free_x")+

  geom_text(

    aes(label = Count),

    colour = "black", size = 2,face="bold",

    vjust = 1

  )+

  coord_flip()+theme_cleveland()

```

### ###BOXPLOT

```

df1$percent_sites<-ordered(df1$percent_sites, levels = c("40-60%", "60-80%", ">80%"),la
bels=c("low intensity","intermediated intensity","high intensity"))

df1%>%filter(result=="Positive")%>% select(organ,ct_value,percent_sites )%>%ggplot(ae
s(x=percent_sites,y=ct_value,fill=organ))+geom_boxplot()+scale_color_brewer(palette="Da
rk2")+labs(x="Intensity infection",y="CT values")+ggtitle("Boxplot-CTvalues of infection or
gans as per intensity of infection")+

  theme_classic()

'''

```

Note that the `echo = FALSE` parameter was added to the code chunk to prevent printing of the R code that generated the plot

# After adjusting the effects of organs involved whether intensity of infection is affecting the CT values?

```
``{r disease}
```

```
df1[complete.cases(df1[,9]), ]->df3
```

```
df3 %>% select(uid_io,organ,result,percent_sites,ARDS, Hos_Days) %>% tbl_cross(percent_sites,ARDS,missing="no", percent = "cell") %>% add_p()
```

```
df3 %>% filter(result=="Positive"|organ=="Blood") %>% select(uid_io,organ,result,percent_sites,ARDS, Hos_Days) %>% tbl_cross(ARDS,organ,missing="no", percent = "column") %>% add_p()
```

```
```
```
